# Supplementary material
Source: Springer Nature journal article supplement (https://www.springermedizin.de/resource/supplementary/12885_2010_2136_MOESM9_ESM.pdf/9460602)

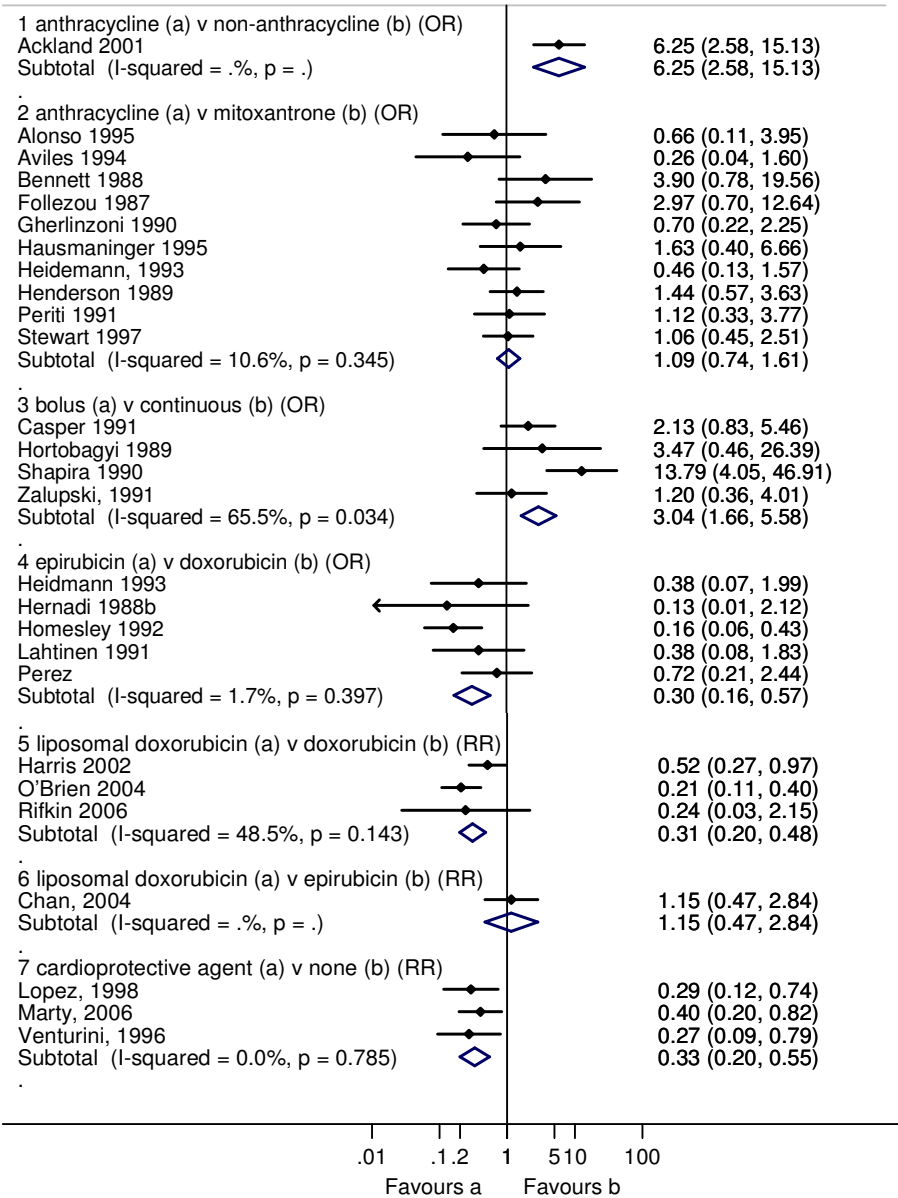

.01 .1 2 1 5 10 100  
 Favours a Favours b

Supplement: MOESM9 [file 9460602]
